# Supplementary material for: Specific Cellular and Humoral Immune Responses to the Neoantigen RBD of SARS-CoV-2 in Patients with Primary and Secondary Immunodeficiency and Healthy Donors
Source: MDPI journal article supplement (doi:10.3390/biomedicines11041042), 2023-03-28
Supplement: s1 [file s1]

**Supplementary Table S1.** Epidemiological and main clinical features of PID patients. RRTI: recurrent respiratory tract infections;

| PID patient No. | Sex | Age | Main clinical features                                                                                                                                                                   | IgRT |
|-----------------|-----|-----|------------------------------------------------------------------------------------------------------------------------------------------------------------------------------------------|------|
| PID 1           | F   | 41  | RRTI, splenomegaly, bronchiectasis, insulin resistance                                                                                                                                   | IVIG |
| PID 2           | M   | 18  | RRTI                                                                                                                                                                                     | SCIG |
| PID 3           | M   | 55  | RRTI, LGL leukemia                                                                                                                                                                       | IVIG |
| PID 4           | F   | 33  | RRTI, bronchiectasis, splenomegaly,                                                                                                                                                      | IVIG |
| PID 5           | F   | 30  | RRTI                                                                                                                                                                                     | IVIG |
| PID 6           | F   | 45  | RRTI, chronic gastritis due to <i>H. pylori</i> eradicated in 2013, ferropenic anemia and T CD8 <sup>+</sup> lymphopenia                                                                 | IVIG |
| PID 7           | M   | 42  | RRTI, pancytopenia related to CMV infection and inflammatory disease                                                                                                                     | SCIG |
| PID 8           | M   | 28  | RRTI                                                                                                                                                                                     | SCIG |
| PID 9           | F   | 69  | RRTI, TTP                                                                                                                                                                                | SCIG |
| PID 10          | M   | 57  | RRTI, hypothyroidism                                                                                                                                                                     | IVIG |
| PID 11          | F   | 65  | RRTI, lymphoid granulomatosis with interstitial lung involvement, received treatment with rituximab (2016 to 2017) with secondary leukopenia, pigmented purpuric dermatosis              | IVIG |
| PID 12          | F   | 74  | RRTI                                                                                                                                                                                     | IVIG |
| PID 13          | F   | 71  | RRTI                                                                                                                                                                                     | IVIG |
| PID 14          | F   | 67  | RRTI, chronic gastritis due to <i>H. pylori</i>                                                                                                                                          | IVIG |
| PID 15          | M   | 47  | RRTI, chronic gastritis with intestinal metaplasia due to <i>H. pylori</i> eradicated in 2015                                                                                            | IVIG |
| PID 16          | F   | 30  | RRTI                                                                                                                                                                                     | No   |
| PID 17          | F   | 58  | RRTI, TTP, splenomegaly, APS                                                                                                                                                             | IVIG |
| PID 18          | F   | 62  | RRTI, inverted psoriasis, polyarthralgia, CD4 <sup>+</sup> T lymphopenia                                                                                                                 | SCIG |
| PID 19          | F   | 45  | RRTI, UTI, CD4 <sup>+</sup> T lymphopenia                                                                                                                                                | SCIG |
| PID 20          | F   | 59  | RRTI, chronic gastritis associated with non-eradicated <i>H. pylori</i> , malabsorption syndrome, nodular lymphoid hyperplasia and hiatal hernia, recurrence of thyroid papillary cancer | IVIG |

**Supplementary Table S2.** Epidemiological and main clinical features of SID patients. FCR: fludarabine, cyclophosphamide and rituximab; R-CHOP: rituximab, cyclophosphamide, hydroxydaunorubicin hydrochloride (doxorubicin hydrochloride), vincristine (Oncovin) and prednisone; BR: bendamustine and rituximab. ITP: immune thrombocytopenia; RRTI: recurrent respiratory tract infections; RUTI: recurrent urinary tract infections.

| SID patient | Sex | Age (yrs) | Clinical history                                                                         | Disease status        | IgRT |
|-------------|-----|-----------|------------------------------------------------------------------------------------------|-----------------------|------|
| SID 1       | F   | 58        | NHL, RRTI                                                                                | Not treated           | No   |
| SID 2       | F   | 85        | NHL treated with FCR, RRTI, malabsorption syndrome                                       | In complete remission | IVIG |
| SID 3       | F   | 68        | CLL, RRTI, hypothyroidism                                                                | Not treated           | No   |
| SID 4       | M   | 73        | MM, RRTI                                                                                 | Not treated           | No   |
| SID 5       | M   | 72        | CLL, RRTI                                                                                | Not treated           | IVIG |
| SID 6       | F   | 61        | CLL, RRTI, asthma, RUTI                                                                  | Not treated           | IVIG |
| SID 7       | F   | 66        | MGUS, RRTI, RUTI, ITP                                                                    | Not treated           | No   |
| SID 8       | F   | 68        | NHL treated with FCR, RRTI                                                               | In complete remission | IVIG |
| SID 9       | F   | 72        | NHL treated with FCR, RRTI                                                               | In complete remission | IVIG |
| SID 10      | F   | 67        | Diffuse large B-cell lymphoma treated with R-CHOP, RRTI                                  | In complete remission | IVIG |
| SID 11      | F   | 66        | Diffuse large B-cell lymphoma treated with R-CHOP, RRTI, lymphoid interstitial pneumonia | In complete remission | IVIG |
| SID 12      | M   | 55        | NHL treated with BR, RRTI                                                                | In complete remission | IVIG |
| SID 13      | M   | 83        | NHL treated with rituximab, RRTI, ITP, bronchiectasis                                    | In complete remission | IVIG |

|        |   |    |                                                                                 |                       |      |
|--------|---|----|---------------------------------------------------------------------------------|-----------------------|------|
| SID 14 | F | 68 | NHL treated with FCR, RRTI                                                      | In complete remission | IVIG |
| SID 15 | M | 49 | Diffuse large B-cell lymphoma treated with <i>R-CHOP</i> , RRTI                 | In complete remission | IVIG |
| SID 16 | F | 79 | CLL, RRTI                                                                       | Not treated           | IVIG |
| SID 17 | F | 67 | Diffuse large B-cell lymphoma treated with <i>R-CHOP</i> , RRTI, hypothyroidism | In complete remission | IVIG |
| SID 18 | F | 70 | MGUS, RRTI, acute cholangitis by <i>Staphylococcus aureus</i>                   | Not treated           | IVIG |
| SID 19 | F | 71 | CLL, RRTI                                                                       | Not treated           | No   |
| SID 20 | F | 60 | NHL treated with rituximab, RRTI                                                | In complete remission | IVIG |

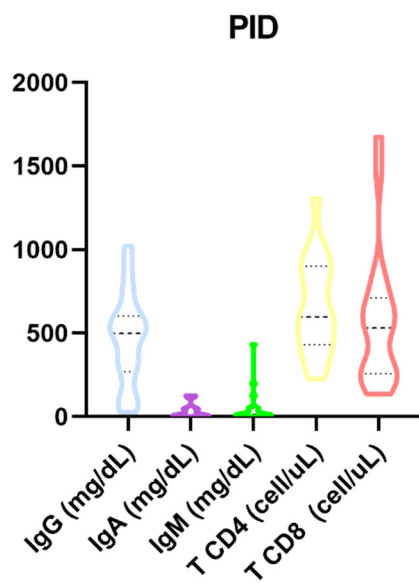

Supplementary Figure S1. Immunological features of the PID group.

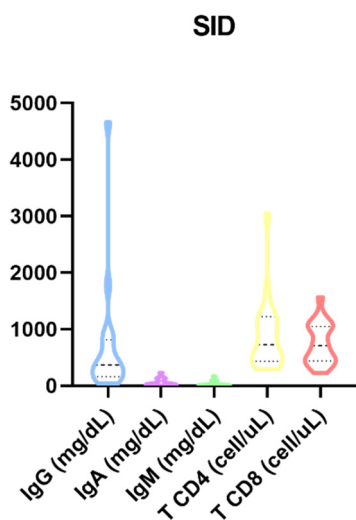

Supplementary Figure S2. Immunological features of the SID group.
